# Supplementary material for: Network-Based Characterization of Depressive Symptoms Among University Students in Lahore with a Focus on Central Drivers of Psychological Distress
Source: Research Square preprint supplement (doi:10.21203/rs.3.rs-8300502/v1), 2025-12-17
Supplement: Supplementary file 1 [file 522b579b2fb462e176997fc5.docx]

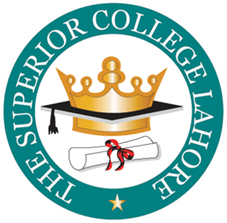


**SUPERIOR UNIVERSITY LAHORE**

**RESEARCH REPORT QUESTIONNAIRE**

Name (Optional)_____________________ Age__________________________

University _________________________ Department___________________

Province __________________________ Sex _________________________

Strongly Agree Neutral Disagree Strongly

Agree disagree

Q no 1: Do you think your studies are heavy work O O O O O

load for your brain?

Q no 2: Do you feel burdened in your routine work? O O O O O

Q no 3: Do you think that you have a high Self

Esteem? O O O O O

Q no 4: Do you bear difficulty in concentration either

in studies or while listening to anyone and

doing anything? O O O O O

Q no 5: Do you feel that you are dependent on others

for daily routine work? O O O O O

Q no 6: Do you feel lack of energy while working or

doing any task? O O O O O

- If yes (you are facing lack of energy), since

how long?

__________________________

Q no 7: Do you feel sleep deprivation since last 3

months? O O O O O

Q no 8: Are you feeling any drastic changes in your

appetite since last 3 or 4 months? O O O O O

Strongly Agree Neutral Disagree Strongly

Agree disagree

Q no 9: What kind of change in appetite you are

Facing?

- Depressed
- Increased
- No change

Q no 10: Do you feel distortion of body image

(Feel uncomfortable and ashamed)

Since last 3 months? O O O O O

Q no 11: Have you ever consulted any psychiatrist?

A) Yes B) No

- Kindly share your views regarding visiting a psychiatrist

______________________________________________________________________________________________________________________________________________________
