# Supplementary material for: Network-Based Characterization of Depressive Symptoms Among University Students in Lahore with a Focus on Central Drivers of Psychological Distress
Source: Research Square preprint supplement (doi:10.21203/rs.3.rs-8300502/v1), 2025-12-17
Supplement: Supplementary file 2 [file eb9b3eeff17c974b803294a6.xlsx]

## Sheet: Sheet1
Research Report Data on students depression
serial no.	Age	Sex	Q#1	Q#2	Q#3	Q#4	Q#5	Q#6 (a)	Q#6(B)	Q#7	Q#8	Q#9	Q#10	Q#11(a)	Q#11(b)
1	21	female	neutral	neutral	agree	disagree	strongly disagree	disagree		strongly disagree	disagree	no change	disagree	no
2	18	female	strongly agree	strongly agree	agree	agree	neutral	agree	since 1 month	strongly agree	srongly agree	depressed	strongly disagree	No
3	23	male	neutral	neutral	neutral	disagree	disagree	neutral		disagree	agree	depressed	neutral	No
4	18	female	agree	agree	agree	strongly agree	disagree	stromgly agree	long time since I was hostelized	disagree	neutral	increased	neutral	No	I guess its helpful while you are facing depression or any kind of stress in life
5	30	male	agree	strongly agree	strongly agree	neutral	agree	neutral		agree	neutral	increased	srongly agree	Yes
6	21	female	Strongly agree	strongly agree	neutral	agree	agree	disagree		disagree	srongly agree	depressed	strongly disagree	No
7	21	female	disagree	disagree	neutral	agree	disagree	neutral		strongly disagree	srongly disagree	no change	strongly disagree	No
8	19	female	strongly disagree	disagree	neutral	agree	neutral	neutral		disagree	disagree	increased	srongly agree
9	21	male	strongly disagree	strongly disagree	strongly disagree	strongly disagree	strongly disagree	strongly disagree		strongly disagree	srongly disagree	no change	strongly disagree	Yes
10	19	female	agree	agree	neutral	neutral	agree	neutral		agree	neutral	no change	neutral	no
11	19	male	neutral	disagree	neutral	agree	disagree	neutral		disagree	neutral	increased	neutral	No
12	18	female	strongly agree	strongly disagree	strongly agree	strongly agree	strongly disagree	strongly disagree		neutal	srongly disagree	no change	neutral	no
13	20	male	neutral	disagree	agree	disagree	agree	disagree		agree	disagree	no change	strongly disagree	no
14	23	female	strongly agree	strongly agree	strongly agree	agree	agree	neutral	2 months	disagree	agree	depressed	agree	No
15	21	male	disagree	agree	strongly agree	disagree	neutral	agree	since 2016	disagree	neutral	depressed	neutral	No
16	20	male	disagree	neutral	strongly agree	agree	disagree	agree	since 1 month	neutal	agree	depressed	agree	Yes
17		male	disagree	neutral	agree	disagree	disagree	strongly agree	1 year	agree	neutral	depressed	strongly agree	No
18	21	male	neutral	agree	agree	agree	disagree	agree	since 3 months	neutal	disagree	increased	agree	Yes
19	19	male	disagree	neutral	disagree	agree	strongly disagree	strongly agree	since 2 years	agree	agree	increased	agree	Yes
20	18	male	strongly disagree	disagree	agree	agree	disagree	agree	since 3 months	disagree	neutral	no change	agree	No
21	20	male	strongly disagree	agree	strongly agree	agree	neutral	agree	after intermediate	agree	neutral	depressed	neutral	No	not interested
22	18	male	strongly agree	agree	strongly agree	agree	neutral	agree	after matric	agree	neutral	depressed	neutral	No	not interested
23	18	male	strongly agree	agree	strongly agree	agree	neutral	agree	since 5 years almost	agree	neutral	depressed	neutral	No	not interested
24	18	male	disagree	disagree	agree	agree	disagree	disagree		disagree	srongly agree	increased	disagree	No
25	19	male	disagree	neutral	disagree	strongly agree	neutral	disagree		strongly agree	neutral	increased	agree	No
26	21	male	neutral	agree	disagree	strongly agree	neutral	strongly agree	since 4 months	neutal	agree	increased	strongly agree	No
27	21	female	neutral	agree	agree	disagree	disagree	neutral		neutal	disagree	increased	neutral	No
28	21	male	disagree	disagree	disagree	disagree	disagree	disagree		disagree	disagree	depressed	disagree	No	no views
29	21	male	agree	agree	disagree	disagree	agree	disagree		agree	neutral	no change	disagree	no
30	20	female	strongly agree	agree	strongly agree	strongly disagree	disagree	agree	for a few minutes	disagree	strongly agree	depressed	strongly disagree	No
31	22	female	strongly agree	strongly agree	strongly agree	disagree	strongly disagree	neutral		strongly disagree	stongly disagree	depressed	strongly disagree	No
32	19	female	strongly agree	agree	strongly agree	strongly disagree	strongly disagree	agree	for few minutes	strongly disagree	strongly agree	depressed	strongly disagree	No
33	19	female	disagree	disagree	agree	strongly agree	strongly agree	strongly disagree		neutal	agree	depressed	disagree	No
34	19	Female	Neutral	Agree	Agree	strongly agree	Neutral	Agree	since 3 years	Neutal	Agree	Depressed	Disagree	No
35	20	Female	Neutral	Disagree	Disagree	Disagree	Disagree	Disagree		Disagree	Agree	No change	Disagree	No
36	21	Female	Agree	Agree	Neutral	Neutral	Neutral	Agree	since 5 months	Neutal	Agree	Increased	Neutral	no
37	22	Female	strongly agree	strongly agree	Neutral	Neutral	Neutral	Agree	since 7 months	Neutal	Agree	Depressed	Neutral	No
38	20	Female	Agree	Neutral	Neutral	Agree	strongly disagree	strongly agree	Last one year	Agree	strongly agree	Depressed	Disagree	No	It is not necessary but sometimes important to check to any psychiatrist
39	19	Female	Agree	Neutral	Neutral	strongly agree	neutral	strongly agree	Since one year	Disagree	Agree	Increased	Agree	No	I think it is not ncessary to consulted or visited to any psychiatrist
40	20	Female	Neutral	Agree	Neutral	Agree	Disagree	Neutral		Disagree	Neutral	No change	Neutral	No
41	23	Female	strongly disagree	Agree	strongly agree	Agree	Neutral	Agree	Last one year	strongly disagree	Agree	Increased	strongly disagree	yes	They teach you to relax and control your brain, but my experience is that no one can help you except yourself, Trust ALLAH and head up, you'll recover soon.
42	21	Male	Disagree	Disagree	Neutral	Neutral	Disagree	Neutral		Disagree	Disagree	No change	Neutral	No	It's a good thing to visit psychiatrist, specially when you have mental crisis.
43	19	Female	Agree	strongly agree	Agree	Neutral	strongly disagree	Neutral		strongly agree	Neutral	Depressed	strongly disagree	No	psychiatrist notes the views of others and also thinks theviews of that particylar person to other that what he feel when he saw others.
44	20	Male	Agree	Neutral	Agree	neutral	Neutral	strongly agree	Since I got admission in superior university	neutral	neutral	depressed	neutral	no	Yes, everyone should visit psychistrist because young generation is depressed due to institute.
45	21	Female	Neutral	Neutral	strongly agree	Neutral	Disagree	Neutral	Since I got admission in superior university	Neutal	strongly agree	Depressed	Neutral	No
46	23	Female	strongly agree	strongly agree	strongly agree	strongly agree	strongly agree	strongly agree	Since I got admission in superior university	strongly agree	strongly agree	Depressed	Neutral	No	YES, I need because I am depresed.
47	23	Male	strongly agree	strongly agree	strongly agree	strongly agree	strongly agree	strongly agree	Since I got admission in superior university	strongly agree	strongly agree	depressed	Neutral	No	As we are student of superior, so we should need to visit psychaitrist.
48	21	Female	Disagree	Disagree	Neutral	agree	disagree	agree	2 years	strongly disagree	agree	depressed	agree	no
49	22	male	strongly disagree	neutral	strongly agree	neutral	disagree	disagree		strongly disagree	disagree	increased	neutral	no	I have no need.
50	20	Female	disagree	disagree	disagree	disagree	disagree	disagree		disagree	disagree	no change	disagree	no
51	21	female	neutral	strongly agree	strongly agree	neutral	strongly disagree	neutral		strongly agree	neutral	depressed	neutral	no
52	21	female	neutral	agree	neutral	strongly disagree	strongly disagree	neutral		neutal	neutral	depressed	neutral	no
53	22	female	agree	agree	neutral	strongly disagree	strongly disagree	neutral		strongly disagree	neutral	depressed	strongly disagree	no
54	20	female	neutral	agree	agree	disagree	disagree	neutral		disagree	neutral	no change	neutral	no
55	22	male	neutral	neutral	neutral	neutral	neutral	agree	1 year before	agree	agree	depressed	neutral	no	Yes, we should visit.
56			agree	agree	agree	agree	disagree	agree	since 3 months	agree	agree	depressed	agree	no
57	17	female	agree	strongly agree	agree	neutral	strongly disagree	neutral		strongly agree	neutral	depressed	strongly disagree	no	Psychiatrist thinks the views of other people which the other person wants to said.
58	21	female	agree	neutral	neutral	disagree	strongly disagree	neutral		disagree	disagree	no change	agree	no
59	20	female	agree	neutral	strongly disagree	agree	disagree	agree	1 year	agree	neutral	increased	agree	no
60	20	female	agree	agree	agree	agree	agree	agree	upto 3 months	strongly agree	strongly agree	depressed	neutral	no
61	21	female	disagree	disagree	strongly agree	agree	disagree	agree	a week after vacation	strongly agree	agree	depressed	strongly agree	no	I did not have yet but really wants to because of my routine and stress.
62	19	female	disagree	disagree	strongly disagree	neutral	neutral	neutral		neutal	agree	depressed	disagree	no
63	19	male	strongly disagree	neutral	neutral	neutral	disagree	neutral		neutal	neutral	no change	neutral	no
64	22	female	strongly agree	strongly agree	strongly agree	agree	neutral	strongly agree	since 6 months	strongly agree	strongly agree	increased	strongly agree	no	maybe
65	22	female	strongly agree	strongly agree	strongly agree	strongly agree	neutral	neutral		strongly disagree	neutral	depressed	strongly agree	no
66	21	female	strongly agree	strongly agree	neutral	agree	disagree	strongly agree	4 years	strongly agree	agree	increased	neutral	no
67	23	female	strongly agree	strongly agree	agree	neutral	agree	strongly agree	since 2 months	agree	agree	no change	disagree	Yes
68	22	female	strongly agree	strongly agree	agree	agree	disagree	strongly agree	2 months ago	strongly disagree	disagree	depressed	neutral	no
69	22	female	strongly agree	neutral	strongly agree	strongly disagree	strongly disagree	strongly disagree		neutal	neutral	depressed	neutral	no
70	22	female	neutral	strongly agree	strongly agree	strongly disagree	strongly disagree	strongly disagree		strongly disagree	strongly disagree	increased	neutral	no
71	21	female	strongly agree	strongly agree	strongly agree	strongly agree	strongly agree	strongly agree	after coming in uni	strongly agree	strongly agree	depressed	strongly agree	no
72		female	strongly agree	strongly agree	strongly agree	strongly agree	strongly agree	strongly agree	from 1st year of MBBS	strongly agree	strongly agree	depressed	strongly agree	no
73	22	female	neutral	disagree	disagree	disagree	strongly disagree	neutral		disagree	disagree	no change	neutral	no
74	22	male	strongly agree	strongly agree	strongly agree	strongly agree	strongly disagree	neutral		agree	agree	no change	strongly disagree	no
75	22	female	strongly agree	strongly agree	strongly agree	agree	disagree	agree	2-3 years	neutal	neutral	no change	strongly disagree	no	you should only visit a psychiatrist if you find yourself stuck in life due to depression,anxiety and emotional instability.
76	27	female	strongly agree	strongly agree	strongly agree	strongly agree	strongly agree	strongly agree	always	strongly agree	strongly agree	depressed	strongly agree	Yes	He thinks I am crazy.
77	22	male	strongly agree	agree	strongly agree	strongly agree	strongly disagree	strongly agree	4 years	strongly agree	strongly disagree	no change	strongly disagree	no
78	19	male	strongly agree	neutral	agree	agree	neutral	disagree		disagree	disagree	depressed	disagree	no
79	21	male	strongly agree	strongly disagree	neutral	neutral	neutral	agree	since 4 months	agree	neutral	increased	agree	no
80	21	male	agree	neutral	agree	disagree	disagree	agree	almost 2 years	neutal	neutral	depressed	neutral	no
81	19	female	disagree	disagree	agree	agree	neutral	neutral		strongly disagree	disagree	no change	disagree	no	It is necessary to visit a psychiatrist, so that you know about your mental health which is directly associated with the mood switching.
82	19	female	neutral	agree	strongly agree	agree	neutral	neutral		agree	neutral	depressed	disagree	no
83	20	female	strongly agree	strongly agree	strongly agree	strongly agree	strongly agree	strongly agree	since 3 months	agree	strongly agree	depressed	strongly agree	yes	I have no views because I have already a lot of burden of my study specially immunology.
84	19	male	agree	agree	neutral	agree	strongly agree	agree	since 2 months	strongly agree	agree	depressed	agree	no
85	20	female	disagree	disagree	disagree	disagree	agree	strongly agree	since 2 months	strongly agree	agree	depressed	agree	no
86	20	female	strongly agree	neutral	agree	agree	agree	agree	since 4 months	disagree	neutral	increased	neutral	no	I have never visited psychiatrist.
87	21	female	disagree	disagree	neutral	disagree	strongly disagree	strongly disagree	no	disagree	disagree	no change	neutral	no
88	20	female	strongly disagree	disagree	strongly disagree	neutral	agree	neutral		agree	neutral	depressed	disagree	Yes	If you have proper check then you can find a problem or any stress in routine.
89	21	male	agree	strongly agree	agree	agree	strongly agree	agree	since 4 years	strongly agree	agree	increased	agree	no
90			strongly disagree	disagree	disagree	strongly disagree	strongly disagree	strongly disagree		disagree	disagree	no change	strongly disagree	no	no vivit yet.
91	18	female	disagree	neutral	strongly agree	disagree	strongly disagree	strongly agree	since 6 months	disagree	strongly agree	depressed	disagree	no	No
92	20	female	disagree	neutral	strongly agree	strongly disagree	strongly disagree	agree	last one year	strongly disagree	strongly disagree	depressed	neutral	no	We shouls visit psychiatrist because he can gave us advice which will be helpful for us.
93	20	male	disagree	neutral	agree	neutral	disagree	neutral		disagree	agree	increased	disagree	no
94		male	disagree	disagree	neutral	strongly disagree	strongly disagree	strongly disagree		disagree	disagree	no change	strongly disagree	no
95	22	male	strongly agree	strongly agree	neutral	agree	strongly disagree	strongly agree	2 years	strongly agree	agree	increased	strongly disagree	no
96	20	male	disagree	disagree	agree	agree	strongly disagree	neutral		agree	agree	depressed	strongly disagree	no
97	19	female	disagree	strongly disagree	agree	agree	disagree	neutral		agree	agree	depressed	strongly disagree	no
98	20	male	strongly agree	strongly agree	neutral	strongly agree	agree	strongly agree	2 years	strongly disagree	agree	depressed	agree	no
99	19	male	neutral	strongly disagree	disagree	disagree	strongly disagree	disagree		strongly disagree	strongly disagree	depressed	neutral	No
100	20	female	neutral	agree	neutral	disagree	agree	agree	since 1 year	disagree	disagree	no change	disagree	no
101	20	male	strongly agree	agree	agree	strongly agree	disagree	strongly agree	since 1 month	agree	neutral	increased	disagree	no
102	19	male	strongly agree	agree	agree	agree	disagree	agree	since 3 years	agree	agree	depressed	neutral	no
103	19	male	agree	strongly agree	neutral	neutral	disagree	strongly agree	almost 3 years	agree	strongly agree	depressed	strongly agree	no
104	20	male	agree	agree	strongly agree	neutral	neutral	agree	since 4 months	agree	agree	depressed	agree	no	No
105	20	male	agree	strongly agree	neutral	agree	strongly agree	strongly agree	about 3 years	neutal	strongly agree	depressed	agree	no
106	20	female	neutral	disagree	strongly agree	disagree	agree	agree	about 3 years	disagree	disagree	no change	disagree	no
107	19	female	agree	strongly agree	agree	neutral	agree	agree	since 4 months	disagree	strongly disagree	depressed	agree	Yes
108	19	female	disagree	agree	strongly agree	agree	strongly disagree	strongly agree	since 2 years	disagree	agree	no change	disagree	no
109	22	female	strongly agree	agree	neutral	agree	strongly disagree	strongly disagree		strongly disagree	strongly disagree	depressed	strongly disagree	no	No
110			strongly agree	neutral	neutral	agree	agree	agree	about 1 year	agree	agree	increased	strongly disagree	no	I think Yes!
111		female	strongly agree	strongly agree	strongly agree	disagree	strongly agree	strongly disagree		neutal	neutral	depressed	neutral	no
112	22	female	strongly agree	strongly agree	agree	strongly agree	agree	agree	since 2 months	strongly disagree	strongly agree	depressed	strongly agree	Yes
113			strongly agree	strongly agree	agree	agree	agree	strongly agree	since 7 months		agree	depressed	agree	no
114	21	male	neutral	disagree	neutral	neutral	strongly disagree	strongly disagree		disagree	strongly disagree	no change	strongly disagree	no
115	19	male	disagree	neutral	strongly disagree	strongly agree	strongly disagree	strongly disagree		strongly disagree	neutral	no change	strongly disagree	no
116	22	female	strongly agree	agree	neutral	neutral	disagree	agree	since 2-3 years	neutal	agree	depressed	disagree	no
117		female	disagree	agree	agree	disagree	strongly disagree	neutral	from the 1st day of university	neutal	disagree	increased	strongly disagree	no
118		female	disagree	neutral	agree	disagree	strongly disagree	strongly disagree		disagree	agree	depressed	neutral	no
119	21	female	agree	agree	agree	agree	disagree	neutral	3 years	strongly agree	agree	increased	disagree	no
120	23	female	strongly disagree	strongly disagree	strongly agree	strongly agree	strongly disagree	strongly disagree		strongly disagree	strongly agree	no change	strongly disagree	no	No idea, No experience
121	21	female	neutral	neutral	strongly agree	strongly disagree	disagree	agree	6 months	strongly agree	agree	depressed	disagree	no
122	22	female	strongly agree	strongly agree	strongly agree	strongly agree	strongly agree	strongly agree	before 8 months almost	strongly agree	strongly agree	depressed	strongly agree	Yes
123	18	female	strongly agree	neutral	neutral	strongly agree	neutral	agree	about 2 years	strongly agree	neutral	no change	strongly agree	no	It's a good survey.
124	19	female	neutral	neutral	neutral	disagree	disagree	disagree		disagree	strongly agree	depressed	disagree	no
125	19	female	strongly agree	agree	neutral	agree	disagree	disagree		disagree	strongly agree	increased	strongly disagree	no
126	19	female	agree	neutral	disagree	disagree	neutral	agree	since 5 months	neutal	neutral	no change	neutral	no
127	21	female	agree	agree	agree	agree	strongly disagree	strongly disagree		strongly agree	agree	depressed	disagree	no
128	20	Female	agree	neutral	disagree	agree	disagree	neutral		disagree	neutral	depressed	agree	no
129	19	female	strongly disagree	disagree	disagree	agree	disagree	agree	since 1 year	neutal	strongly disagree	increased	disagree	no
130	20	female	neutral	agree	neutral	disagree	disagree	neutral		disagree	disagree	increased	disagree	no
131	22	male	strongly agree	agree	agree	disagree	neutral	strongly disagree	never	neutal	strongly agree	depressed	strongly disagree	no
132	19	female	strongly disagree	strongly agree	strongly disagree	strongly agree	strongly agree	strongly disagree		strongly agree	strongly agree	increased	agree	no
133	21	female	disagree	neutral	strongly agree	neutral	disagree	agree	since 4 months	neutal	agree	depressed	agree	no
134	23	male	strongly agree	strongly disagree	neutral	strongly disagree	strongly disagree	neutral		strongly disagree	agree	depressed	strongly disagree	no
135	19	female	disagree	disagree	neutral	disagree	disagree	neutral		neutal	agree	depressed	strongly disagree	no
136	22	female	disagree	agree	disagree	strongly disagree	neutral	neutral		agree	agree	increased	neutral	no
137	20	female	neutral	agree	disagree	agree	neutral	neutral		neutal	neutral	increased	neutral	no
138	20	female	neutral	agree	neutral	neutral	disagree	disagree		disagree	disagree	no change	disagree	no	Never visit to psychiatrist.
139	21	female	neutral	disagree	strongly agree	disagree	strongly disagree	disagree		neutal	agree	increased	disagree	no
140	21	male	neutral	disagree	strongly agree	disagree	strongly disagree	disagree		neutal	agree	increased	disagree	no
141	20	female	neutral	agree	strongly agree	disagree	disagree	disagree		strongly disagree	disagree	no change	strongly disagree	no
142	20	female	neutral	agree	strongly agree	disagree	disagree	disagree		strongly disagree	disagree	no change	strongly disagree	no
143	21	female	disagree	strongly disagree	neutral	agree	disagree	neutral		disagree	disagree	no change	disagree	no
144	18	female	agree	neutral	strongly agree	agree	strongly agree	disagree		neutal	strongly agree	depressed	strongly disagree	yes	It's good for our mental health.
145	20	female	agree	agree	strongly agree	agree	neutral	agree	since 3 months	agree	agree	depressed	disagree	no
146	19	female	strongly disagree	agree	strongly disagree	agree	agree	strongly agree	since 1 month	agree	agree	depressed	agree	no
147	21	female	neutral	neutral	neutral	disagree	neutral	neutral		agree	neutral	no change	neutral	no
148	18	female	disagree	strongly agree	agree	agree	disagree	strongly disagree		strongly agree	strongly agree	no change	disagree	no
149	19	female	agree	agree	agree	disagree	strongly disagree	agree	1 year	neutal	agree	depressed	neutral	no
150	19	male	disagree	neutral	agree	neutral	strongly disagree	strongly disagree		strongly disagree	strongly disagree	no change	neutral	no
151	21	male	strongly agree	neutral	neutral	agree	disagree	strongly agree	since few days	neutal	strongly agree	depressed	neutral	no	No
152	19	male	agree	agree	disagree	strongly disagree	disagree	disagree		disagree	disagree	depressed	strongly disagree	no
153	18	female	disagree	strongly disagree	strongly agree	neutral	strongly disagree	disagree		strongly agree	strongly agree	depressed	neutral	no	No
154	20	female	strongly disagree	disagree	agree	disagree	disagree	disagree		disagree	agree	depressed	neutral	no	No
155	21	male	strongly disagree	strongly disagree	neutral	disagree	agree	strongly disagree		agree	strongly disagree	no change	neutral	no
156	20	male	disagree	neutral	strongly disagree	strongly disagree	neutral	agree	since 4 months	disagree	neutral	no change	agree	no
157	20	male	strongly disagree	neutral	strongly disagree	neutral	neutral	strongly disagree		neutal	strongly disagree	no change	agree	no
158	19	female	neutral	agree	agree	neutral	disagree	strongly agree	since 2 months	agree	strongly agree	depressed	neutral	Yes	They said that be realx and take no depression on little things and issues.
159	20	female	strongly agree	strongly agree	strongly agree	neutral	agree	neutral		agree	disagree	increased	strongly disagree	no
160	22	female	disagree	neutral	neutral	disagree	neutral	disagree		disagree	disagree	no change	disagree	no
161	22	female	strongly agree	strongly agree	neutral	strongly agree	agree	strongly agree	since 1 year	agree	neutral	no change	agree	no
162	20	female	disagree	strongly disagree	agree	disagree	agree	neutral	since in superior uni	disagree	strongly disagree	no change	strongly disagree	no
163	20	female	disagree	disagree	neutral	neutral	disagree	neutral		disagree	disagree	depressed	disagree	no
164	24	female	strongly agree	agree	neutral	strongly agree	strongly disagree	neutral		strongly agree	disagree	no change	neutral	no
165	19	female	strongly agree	strongly agree	disagree	strongly agree	neutral	neutral		disagree	disagree	increased	disagree	no
166	20	female	strongly agree	strongly agree	disagree	strongly agree	neutral	neutral		disagree	disagree	increased	strongly disagree	no	never visiting.
167	20	female	neutral	disagree	agree	disagree	disagree	neutral		neutal	disagree	no change	disagree	no
168	21	male	strongly agree	strongly disagree	strongly disagree	disagree	strongly agree	agree	since 1 month	strongly agree	strongly disagree	no change	strongly agree	no
169	19	female	agree	strongly agree	agree	agree	strongly disagree	neutral		strongly agree	neutral	depressed	disagree	no
170	23	male	neutral	disagree	strongly agree	agree	strongly disagree	disagree		disagree	disagree	no change	disagree	no
171		female	neutral	disagree	agree	agree	strongly disagree	neutral		strongly disagree	strongly disagree	increased	strongly disagree	no
172		female	neutral	strongly disagree	strongly agree	neutral	strongly disagree	neutral	2 months	strongly disagree	disagree	increased	neutral	no
173	21	male	strongly disagree	strongly disagree	disagree	disagree	disagree	disagree		disagree	disagree	no change	disagree	no	I would like to.
174	23	male	agree	neutral	agree	strongly agree	agree	strongly agree	since 1 month	neutal	strongly agree	increased	agree	no
175	24	male	agree	agree	agree	strongly agree	agree	neutral		agree	agree	depressed	neutral	no
176	20	male	agree	agree	disagree	agree	strongly disagree	disagree		strongly disagree	agree	increased	neutral	no	I think it is necessary for a regular student.
177	21	female	neutral	disagree	disagree	strongly disagree	strongly disagree	strongly disagree		neutal	disagree	no change	disagree	no
178	21	female	neutral	disagree	neutral	strongly disagree	strongly disagree	strongly disagree		neutal	strongly disagree	no change	strongly disagree	no
179	23	male	strongly agree	strongly agree	strongly disagree	strongly disagree	strongly agree	strongly agree	from 5 moths	strongly disagree	strongly disagree	depressed	neutral	no	Don't go, stay home stay blessed.
180	20	male	disagree	disagree	neutral	disagree	disagree	disagree		neutal	neutral	increased	strongly disagree	no
181	19	male	strongly agree	agree	disagree	agree	neutral	disagree		disagree	agree	depressed	strongly agree	Yes
182	23	male	strongly disagree	strongly agree	agree	agree	strongly agree	strongly disagree		strongly agree	strongly disagree	no change	neutral	Yes	Total disagree
183	19	female	strongly agree	neutral	strongly disagree	neutral	agree	agree	since 2 years	strongly agree	strongly agree	depressed	disagree	no
184	20	male	strongly agree	neutral	strongly disagree	neutral	strongly disagree	agree	since 2 months	strongly agree	neutral	no change	disagree	no	Strongly disagree
185	19	Female	strongly agree	agree	agree	agree	neutral	agree	since 3 months	agree	disagree	depressed	strongly agree	no
186	20	female	strongly agree	strongly agree	strongly agree	strongly agree	strongly agree	strongly agree	since 4 months	strongly disagree	strongly agree	increased	strongly agree	no	No
187	20	female	strongly agree	strongly agree	strongly agree	agree	agree	strongly agree	simce 3 years	neutal	agree	depressed	agree	no	No, there is no need to visit psychiartrist.
188	21	male	strongly agree	strongly agree	agree	strongly agree	agree	neutral		disagree	agree	depressed	disagree	no	If sombody feel depressed He/She must visit psychiatrist.
189	21	male	neutral	neutral	agree	disagree	disagree	agree	since 3 months	neutal	neutral	depressed	agree	no	Yes, If you need.
190	19		strongly agree	neutral	agree	agree	strongly disagree	agree	since 2 months	strongly agree	disagree	no change	agree	Yes
191	19	female	strongly agree	agree	strongly agree	neutral	strongly agree	neutral		strongly agree	neutral	depressed	strongly agree	no	Very Good
192	20	female	strongly agree	neutral	agree	neutral	disagree	disagree		neutal	strongly agree	increased	neutral	no
193	21	female	strongly agree	strongly agree	neutral	disagree	strongly agree	strongly agree	since 5 months	strongly agree	neutral	no change	neutral	no
194	24	male	strongly agree	neutral	neutral	agree	strongly disagree	strongly disagree		strongly agree	strongly agree	depressed	strongly agree	Yes	He was very nice, and handle me very well also understand my condition.
195	21	female	disagree	agree	strongly agree	neutral	strongly disagree	strongly disagree		neutal	strongly disagree	no change	strongly disagree	no
196	20	female	disagree	agree	strongly agree	neutral	strongly disagree	strongly disagree		neutal	strongly disagree	no change	strongly disagree	no
199	20	female	strongly agree	strongly agree	strongly disagree	strongly agree	strongly disagree	strongly agree	since 1 year	strongly disagree	strongly disagree	depressed	strongly disagree	no
200	21	male	agree	agree	neutral	disagree	disagree	neutral		neutal	neutral	depressed	neutral	no
201	22	female	neutral	agree	agree	agree	strongly agree	strongly agree	since 3 months	neutal	agree	depressed	agree	no
202		female	neutral	agree	neutral	neutral	disagree	agree	since 1 month	strongly agree	neutral	increased	disagree	no
203		female	agree	agree	agree	disagree	disagree	neutral	since 3 months	agree	agree	increased	disagree	no
204	22	female	strongly agree	agree	agree	disagree	disagree	agree	since lasst 4 months	strongly agree	strongly agree	increased	neutral	no
205	22	male	disagree	neutral	agree	agree	neutral	disagree		strongly disagree	disagree	depressed	agree	no
206	21	male	strongly agree	agree	strongly agree	disagree	strongly disagree	agree	3 years or more	agree	strongly agree	increased	agree	no	Not visit any psychiatrist until my life.
207	20	male	strongly agree	strongly agree	agree	strongly agree	strongly agree	strongly agree	since forever	strongly agree	strongly agree	depressed	strongly disagree	Yes	She said that I am a very depressed personality and really negative point of view about life.
208	21	female	neutral	strongly disagree	agree	agree	strongly disagree	agree	since 6 months	neutal	agree	depressed	agree	Yes
209	21	male	agree	neutral	agree	disagree	disagree	disagree		disagree	strongly agree	increased	strongly disagree	no
210	21	male	agree	agree	agree	disagree	disagree	agree	3 years	agree	agree	depressed	disagree	no	I think he help to come out from issues.
211	19	female	strongly agree	strongly agree	neutral	neutral	neutral	agree	3 years	strongly agree	strongly agree	no change	neutral	no
212	20	female	agree	neutral	neutral	neutral	agree	neutral		neutal	neutral	depressed	agree	yes	It was good Experience.
213	19	female	agree	agree	agree	neutral	disagree	agree	3 years	neutal	agree	depressed	neutral	no
214	19	female	agree	neutral	agree	disagree	neutral	neutral	during BS	agree	agree	depressed	disagree	no
215	20	female	agree	agree	strongly agree	agree	disagree	agree	2-3 years	disagree	disagree	no change	disagree	no	The suffering one's should visit the pyschiatrist regularly.
216	22	female	agree	strongly agree	agree	disagree	strongly disagree	neutral		strongly agree	neutral	No change	disagree	no
217	20	female	neutral	strongly agree	disagree	disagree	strongly disagree	agree	since 4 months	agree	neutral	increased	strongly disagree	no
218	20		agree	strongly agree	neutral	strongly disagree	strongly disagree	agree	since 7 months	neutal	neutral	no change	neutral	no
219	25	male	disagree	disagree	agree	agree	disagree	disagree		disagree	disagree	no change	disagree	no
220	23	male	strongly disagree	strongly disagree	strongly agree	neutral	agree	agree	since 1 month	strongly agree	disagree	no change	strongly disagree	no	No views and not visit a psychiatrist.
221	21	female	agree	strongly agree	agree	strongly disagree	neutral	disagree		agree	disagree	no change	disagree	no
222	20	female	agree	strongly agree	neutral	agree	strongly agree	strongly agree	since 5 months	agree	strongly agree	increased	neutral	no
223	21	male	strongly disagree	disagree	neutral	neutral	strongly disagree	strongly disagree		disagree	disagree	no change	strongly disagree	no
224	20		neutral	disagree	agree	disagree	disagree	strongly agree	since 3 months	disagree	strongly disagree	increased	neutral	yes
225	18	male	strongly agree	agree	disagree	disagree	disagree	agree	since 2 months	strongly disagree	agree	increased	strongly agree	no
226		female	neutral	neutral	neutral	neutral	neutral	disagree		neutal	agree	depressed	disagree	no
227	19	female	neutral	strongly agree	agree	disagree	disagree	agree	since 6 months	neutal	agree	depressed	neutral	no
228	20	female	strongly agree	neutral	neutral	neutral	agree	agree	since 6 months	agree	agree	increased	neutral	no
229	19	female	disagree	strongly agree	strongly disagree	disagree	disagree	agree	since last year	agree	agree	depressed	agree	no	never visiting.
230	18	female	disagree	neutral	neutral	disagree	disagree	disagree		neutal	neutral	no change	disagree	no
231	19	female	neutral	agree	strongly agree	strongly disagree	strongly disagree	strongly disagree		neutal	strongly agree	depressed	neutral	no
232	18	female	neutral	disagree	neutral	agree	neutral	agree	since 2 months	agree	neutral	depressed	agree	yes
233	19	female	neutral	strongly disagree	agree	strongly agree	neutral	agree	3 years	strongly agree	agree	depressed	agree	no
234	20	female	neutral	disagree	neutral	agree	disagree	disagree		agree	agree	depressed	neutral	no	its helpful for our mental health.
235	20	female	strongly agree	agree	strongly agree	disagree	strongly disagree	strongly disagree		agree	agree	no change	strongly disagree	no
236	19	female	disagree	disagree	strongly agree	disagree	disagree	neutral	since 6 months	disagree	disagree	depressed	agree	yes	he told e that I am affected mentally as well as pysically.
237	18	female	neutral	disagree	neutral	disagree	disagree	neutral		strongly disagree	disagree	no change	nseutral	no
238	18	female	strongly disagree	disagree	neutral	strongly disagree	disagree	disagree		neutal	agree	depressed	agree	no
239	19	female	agree	agree	agree	neutral	strongly disagree	strongly disagree		neutal	neutral	depressed	disagree	no	No
240	20	female	agree	neutral	agree	neutral	neutral	agree	since 4 months	agree	agree	depressed	agree	no
241	20	male	agree	agree	neutral	neutral	neutral	neutral		agree	neutral	depressed	agree	yes
242	19	female	strongly agree	strongly agree	strongly agree	agree	agree	strongly agree	2 years before	strongly agree	agree	depressed	strongly agree	no
243	20	female	disagree	disagree	agree	disagree	strongly disagree	agree	since 6 months	disagree	disagree	no change	disagree	no
244	19	female	neutral	agree	agree	neutral	agree	disagree		neutal	agree	increased	neutral	no
245	21	male	strongly agree	strongly agree	strongly agree	strongly agree	strongly agree	strongly agree	since 6 months	strongly agree	strongly agree	depressed	strongly agree	no
246	22	female	agree	neutral	neutral	disagree	disagree	agree	4 years	agree	agree	no change	neutral	no
247	22	female	strongly agree	agree	agree	strongly disagree	strongly disagree	disagree		neutal	neutral	no change	disagree	no
248	19	female	agree	agree	agree	agree	strongly agree	agree	since last year	agree	agree	depressed	agree	no	No
249	18	female	strongly disagree	disagree	neutral	strongly disagree	strongly disagree	disagree		neutal	agree	depressed	agree	no
250	19	female	strongly agree	strongly agree	strongly agree	strongly agree	strongly disagree	strongly agree	since 5 months	strongly agree	strongly agree	depressed	agree	no
251	19	male	strongly agree	strongly disagree	strongly disagree	strongly disagree	disagree	neutral		neutal	neutral	no change	agree	no
252	18	female	neutral	neutral	strongly agree	neutral	strongly disagree	disagree		neutal	neutral	no change	disagree	no
253	19	female	agree	disagree	agree	neutral	agree	neutral	about 2 years	neutral	agree	no change	agree	no
254	18	female	agree	neutral	agree	neutral	disagree	strongly agree	since 4 months	neutal	agree	no change	agree	no
255	19	female	agree	agree	neutral	agree	agree	agree	since 3 years	agree	agree	increased	neutral	no
256	18	female	neutral	neutral	agree	neutral	disagree	agree	since 6 months	disagree	disagree	no change	disagree	no
257	19	female	neutral	agree	neutral	disagree	neutral	neutral		agree	agree	depressed	strongly disagree	yes	it is helful and relaxing.
258	19	female	neutral	strongly agree	neutral	neutral	Neutral	neutral		strongly disagree	neutral	depressed	neutral	no
259	20	female	strongly agree	strongly agree	agree	disagree	strongly disagree	agree	since 3 months	strongly disagree	strongly disagree	no change	disagree	no
260	19	female	neutral	strongly agree	agree	disagree	agree	strongly agree	since 2-3 months	agree	strongly agree	depressed	agree	no
261	19	female	neutral	agree	neutral	neutral	disagree	agree	since 1 month	agree	disagree	depressed	strongly disagree	no	No experience
262	20	female	disagree	disagree	agree	agree	agree	agree	since 6 months	agree	disagree	no change	disagree	no
263	18	female	neutral	disagree	neutral	agree	disagree	neutral		disagree	disagree	no change	disagree	no
264	20	female	agree	agree	neutral	neutral	agree	neutral	since 6 months	disagree	disagree	no change	neutral	no	No
265	19	female	strongly disagree	strongly disagree	disagree	disagree	disagree	neutral		disagree	strongly agree	increased	agree	no
266	18	male	strongly agree	strongly disagree	strongly agree	strongly disagree	strongly disagree	disagree		neutal	disagree	increased	neutral	no
267	19	female	strongly agree	strongly agree	strongly disagree	strongly disagree	strongly agree	strongly disagree		strongly agree	strongly agree	increased	strongly disagree	no
268	24	female	agree	neutral	disagree	agree	neutral	agree	since 2 years	disagree	agree	depressed	agree	no	No
269	19	female	strongly agree	neutral	neutral	disagree	strongly disagree	strongly agree	since 1 monrh	agree	agree	depressed	strongly disagree	no
270	18	female	neutral	neutral	neutral	neutral	neutral	agree	since 10 months	neutal	neutral	no change	disagree	no
271	19	male	disagree	disagree	disagree	disagree	disagree	neutral		disagree	neutral	depressed	strongly disagree	no	I would definitely visit a psychiatrist.
272	17	female	agree	neutral	agree	disagree	disagree	strongly agree	4-5 years	agree	neutral	depressed	neutral	no
273	19	female	disagree	strongly agree	disagree	disagree	disagree	agree	since 5 months	disagree	agree	depressed	agree	yes	he told e that I am affected mentally as well as pysically.
274	19	female	disagree	agree	disagree	disagree	disagree	agree	since 6 months	agree	agree	depressed	agree	no	I would no visited psychiatrist.
275	19	female	disagree	agree	disagree	disagree	disagree	agree	almost 6 months	agree	agree	depressed	neutral	yes	he told e that I am affected mentally as well as pysically.
276	18	male	strongly agree	neutral	strongly disagree	strongly agree	neutral	agree	since 5 months	neutral	strongly agree	no change	strongly agree	yes	Kindly we are fed of filling perfomas, Don't give us to fill anymore.
277	18	female	disagree	neutral	neutral	disagree	strongly disagree	disagree		neutal	neutral	depressed	neutral	no
278	19	male	strongly agree	strongly agree	agree	agree	agree	agree	since 3 years	neutal	strongly agree	increased	agree	no
279	20	male	strongly agree	agree	agree	disagree	agree	disagree		disagree	disagree	increased	neutral	no
280	18	male	strongly agree	agree	agree	agree	strongly disagree	strongly agree	1 month before	disagree	strongly disagree	increased	disagree	no
281	18	male	agree	agree	disagree	agree	agree	agree	since 1 year	agree	agree	increased	neutral	no
282	20	female	agree	agree	neutral	agree	disagree	agree	since 3 months	agree	neutral	depressed	agree	no
283	18	female	agree	agree	neutral	agree	disagree	disagree		agree	neutral	no change	disagree	no	I have not consulting any psychiatrist ever.
284	19	female	agree	strongly agree	strongly agree	agree	neutral	strongly agree	since 2 months	agree	strongly disagree	depressed	strongly disagree	no
285	19	female	strongly agree	strongly agree	agree	agree	agree	agree	since 1 year	agree	strongly agree	increased	disagree	no
286	19	female	strongly agree	neutral	agree	strongly agree	neutral	agree	since 3 months	neutal	neutral	depressed	agree	no	I did not visit yet.
287	19	female	strongly agree	neutral	neutral	disagree	disagree	agree	since 5 months	disagree	disagree	no change	disagree	no	I did not visit yet.
288	19	female	strongly agree	neutral	disagree	disagree	disagree	strongly agree	1 year before	disagree	disagree	no change	disagree	no	I did not visit yet.
289	22	female	disagree	agree	strongly disagree	neutral	strongly disagree	neutral		disagree	neutral	no change	strongly disagree	no
290	18	female	disagree	agree	neutral	neutral	strongly disagree	neutral		neutal	strongly disagree	no change	disagree	no
291	18	female	agree	neutral	strongly disagree	strongly agree	strongly disagree	Neutral	1-2 years	strongly agree	strongly agree	depressed	strongly disagree	yes	I am in a complex of everything around me.
292	20	male	neutral	disagree	neutral	agree	disagree	agree	mostly	disagree	agree	depressed	agree	no
293	21	male	neutral	neutral	agree	disagree	strongly disagree	strongly disagree		agree	neutral	no change	disagree	no
294	19	female	disagree	agree	agree	disagree	disagree	agree	from Fsc	disagree	strongly agree	depressed	disagree	no	I did not visit yet.
295	19	female	agree	strongly agree	neutral	agree	disagree	neutral	since 2 years	agree	neutral	depressed	agree	no
296	19	female	agree	agree	neutral	agree	strongly agree	neutral		strongly agree	neutral	depressed	agree	no
297	19	male	strongly disagree	agree	neutral	disagree	neutral	agree	since 6 months	neutal	neutral	no change	neutral	no	No
298	20	female	neutral	agree	agree	agree	disagree	disagree		strongly disagree	disagree	depressed	disagree	no
299		female	neutral	neutral	neutral	agree	neutral	agree	since 3 months	disagree	disagree	no change	disagree	no
300	17	female	neutral	neutral	agree	agree	disagree	disagree		strongly disagree	neutral	depressed	disagree	no
301	20	male	agree	agree	disagree	disagree	disagree	strongly disagree	no	strongly disagree	disagree	increased	disagree	no	never visiting.
302	20	female	agree	agree	neutral	neutral	strongly disagree	neutral	last one year	strongly agree	strongly agree	depressed	agree	no
303	21	male	strongly disagree	strongly disagree	strongly disagree	strongly disagree	disagree	strongly agree	last 10 months	strongly agree	agree	no change	disagree	no
304	25	male	strongly agree	neutral	disagree	agree	agree	neutral		agree	disagree	increased	neutral	no
305	22	female	strongly disagree	strongly disagree	disagree	strongly agree	syrongly agree	strongly agree	since 5 months	strongly disagree	strongly disagree	depressed	strongly disagree	no
306	21	male	disagree	disagree	neutral	strongly disagree	strongly disagree	strongly disagree		strongly agree	strongly agree	depressed	disagree	no
307	21	male	strongly disagree	strongly disagree	strongly disagree	disagree	disagree	strongly disagree		strongly agree	strongly agree	increased	disagree	no
308	24	male	strongly agree	strongly agree	strongly agree	strongly agree	agree	agree	since 3 months	strongly disagree	strongly disagree	no change	disagree	no
309	23	female	strongly disagree	strongly disagree	disagree	disagree	neutral	disagree		strongly disagree	disagree	no change	strongly disagree	no
310	22	male	strongly agree	agree	agree	strongly agree	agree	strongly agree	since last year	agree	strongly agree	depressed	agree	no
311	22	female	Strongly disagree	strongly disagree	disagree	strongly agree	disagree	disagree		strongly agree	strongly agree	depressed	agree	no
312	21	male	strongly disagree	disagree	strongly disagree	strongly agree	strongly agree	strongly disagree		agree	agree	depressed	disagree	no
313	22	female	strongly agree	strongly agree	strongly agree	strongly agree	agree	agree	since 6 months	disagree	disagree	depressed	strongly disagree	no
314	23	male	strongly disagree	strongly disagree	strongly agree	strongly agree	strongly disagree	strongly disagree		agree	disagree	no change	strongly disagree	no
315	25	male	strongly agree	strongly agree	strongly disagree	disagree	strongly agree	strongly agree	since 2 months	agree	agree	increased	disagree	no
316	23	male	strongly disagree	disagree	strongly disagree	strongly agree	strongly disagree	agree	since 2 months	strongly disagree	agree	depressed	disagree	no
317	20	female	strongly disagree	disagree	strongly agree	strongly disagree	strongly disagree	strongly agree	since last 6 months	agree	strongly disagree	depressed	strongly disagree	no
318	24	male	strongly disagree	strongly disagree	strongly disagree	disagree	strongly agree	agree	since last 5 years	strongly disagree	strongly disagree	increased	strongly disagree	no
319	20	female	strongly disagree	strongly disagree	disagree	agree	neutral	strongly agree	since last 2 months	strongly disagree	strongly disagree	no change	strongly disagree	no
320		female	strongly agree	agree	agree	agree	strongly agree	strongly disagree		strongly disagree	agree	increased	strongly disagree	no
321	24	male	strongly disagree	disagree	strongly disagree	disagree	neutral	strongly agree	since last 2 years	strongly agree	strongly agree	depressed	strongly disagree	no
322	22	female	strongly disagree	disagree	neutral	strongly disagree	disagree	strongly disagree		strongly agree	agree	depressed	agree	no
324	19	female	strongly disagree	strongly disagree	strongly disagree	strongly disagree	strongly disagree	strongly disagree		disagree	disagree	no change	agree	no
325	20	female	strongly disagree	disagree	neutral	strongly disagree	strongly agree	strongly agree	since 1 year	strongly disagree	disagree	depressed	strongly disagree	no
326	21	male	strongly disagree	disagree	agree	neutral	neutral	strongly agree	since 3 months	strongly agree	agree	depressed	strongly disagree	no
327	20	female	strongly disagree	strongly disagree	disagree	strongly agree	agree	strongly agree	since 3 years	strongly agree	neutral	no change	strongly disagree	no
328	21	male	disagree	disagree	neutral	agree	neutral	strongly agree	since 2 years	strongly agree	strongly disagree	depressed	strongly agree	no
329	22	male	strongly disagree	strongly disagree	strongly agree	strongly agree	strongly agree	strongly disagree		strongly agree	strongly agree	depressed	disagree	no
330	21	male	strongly disagree	strongly disagree	disagree	strongly agree	strongly agree	strongly disagree		strongly disagree	disagree	no change	strongly disagree	no
331	22	male	strongly disagree	strongly disagree	disagree	disagree	disagree	strongly agree	since 6 months	strongly agree	neutral	no change	strongly disagree	no
332	19	female	disagree	strongly disagree	strongly disagree	strongly agree	strongly agree	strongly agree	since 1 momth	strongly disagree	strongly disagree	no change	strongly agree	no
333	22	male	strongly disagree	disagree	strongly agree	strongly disagree	strongly agree	strongly disagree	since last 6 months	strongly disagree	strongly disagree	no change	strongly disagree	no
333	23	female	strongly disagree	strongly disagree	strongly disagree	strongly disagree	neutral	strongly agree		strongly disagree	disagree	no change	strongly disagree	no
334	22	female	strongly agree	strongly agree	strongly agree	strongly agree	strongly agree	strongly agree	since 3 months	strongly agree	strongly agree	depressed	neutral	yes
335	22	female	strongly agree	strongly agree	strongly agree	strongly agree	strongly agree	strongly agree	since 6 months	strongly agree	strongly agree	depressed	disagree	no
336	19	female	strongly agree	strongly agree	neutral	neutral	neutral	neutral		agree	agree	increased	neutral	no
337		female	agree	agree	neutral	agree	agree	agree	since 4 months	neutal	neutral	increased	disagree	no
338	22	female	agree	agree	agree	agree	neutral	agree	since last 3 years	disagree	neutral	depressed	agree	no
339		female	neutral	agree	strongly agree	neutral	neutral	agree	since last year	agree	neutral	increased	agree	no
340	20	female	strongly disagree	strongly agree	disagree	strongly agree	disagree	strongly agree	since 2 years	strongly agree	strongly disagree	no change	agree	yes
341	22	male	strongly disagree	agree	agree	strongly disagree	strongly disagree	disagree		disagree	agree	depressed	disagree	no
342	21	female	strongly agree	neutral	agree	disagree	strongly disagree	strongly disagree		disagree	strongly disagree	no change	neutral	no
343	21	female	agree	agree	neutral	disagree	disagree	disagree		disagree	neutral	depressed	neutral	no
344	20	male	agree	neutral	disagree	neutral	agree	strongly agree	since 1 month	neutal	strongly disagree	no change	neutral	no
345	19	female	agree	neutral	neutral	neutral	neutral	agree	since 1 months	neutal	disagree	no change	neutral	no
346		female	strongly agree	agree	neutral	strongly agree	disagree	agree	since 4 months	disagree	strongly agree	depressed	neutral	no
347	19	female	disagree	neutral	agree	disagree	strongly disagree	disagree		disagree	neutral	depressed	disagree	no
348	18	female	agree	agree	neutral	agree	disagree	strongly agree	since 5 months	strongly agree	agree	depressed	neutral	no
349	19	female	agree	neutral	neutral	agree	disagree	disagree		neutal	neutral	no change	neutral	no
350	19	male	neutral	agree	neutral	strongly agree	strongly disagree	disagree		agree	neutral	depressed	agree	no
351	19	female	neutral	agree	agree	disagree	strongly agree	strongly agree	since 3 months	agree	agree	depressed	disagree	no
352	20	female	strongly agree	strongly agree	disagree	strongly agree	strongly agree	neutral		neutal	neutral	depressed	strongly agree	yes	It was good Experience.
353	20	female	strongly agree	agree	agree	neutral	neutral	agree	since 1 month	agree	agree	depressed	neutral	no
354	19	female	agree	neutral	neutral	disagree	neutral	disagree		agree	agree	depressed	agree	no
355	20	female	strongly agree	strongly agree	strongly agree	neutral	neutral	neutral		neutal	neutral	increased	strongly agree	yes	Good experience
356	20	female	disagree	neutral	agree	disagree	strongly disagree	disagree		disagree	neutral	no change	disagree	no
357	22	female	strongly agree	strongly agree	agree	disagree	strongly disagree	agree	since last 2 years	neutal	agree	depressed	strongly disagree	no	Good research about psychological view of person
358	21	female	agree	agree	neutral	disagree	agree	disagree		disagree	disagree	no change	disagree	no
359	22	female	strongly agree	strongly agree	agree	agree	disagree	agree	since many years	agree	agree	depressed	disagree	no
360	21	female	agree	agree	strongly agree	strongly agree	agree	neutral		neutal	neutral	depressed	agree	yes
361	21	female	strongly agree	strongly agree	strongly agree	agree	strongly disagree	agree	since 1 year	strongly disagree	disagree	no change	disagree	no
362	19	male	disagree	disagree	strongly agree	strongly disagree	neutral	disagree		disagree	strongly agree	depressed	neutral	no
363	18	female	agree	agree	agree	neutral	neutral	agree	Since 1 year	agree	agree	depressed	neutral	no
364	20	male	strongly agree	neutral	disagree	neutral	disagree	disagree		disagree	disagree	no change	strongly agree	no
365	29	male	agree	agree	agree	agree	neutral	agree	since 5 year	disagree	neutral	no change	neutral	no
366	19	female	neutral	neutral	agree	strongly disagree	strongly agree	strongly agree	since 1 year	strongly agree	neutral	no change	strongly disagree	no
367	19	female	strongly agree	neutral	agree	disagree	strongly agree	strongly disagree		agree	neutral	increased	agree	yes
368	19	male	strongly agree	strongly agree	strongly agree	strongly agree	strongly disagree	strongly agree	almost 1 year ago	strongly disagree	strongly disagree	no change	strongly agree	yes
369	19	female	strongly agree	neutral	agree	neutral	strongly disagree	agree	since 2 months	disagree	agree	increased	strongly agree	no
370	19	female	agree	strongly agree	agree	disagree	strongly agree	agree	2 years	strongly agree	neutral	depressed	agree	no
371	19	female	agree	strongly agree	agree	neutral	strongly agree	agree	since 8 months	strongly agree	neutral	depressed	agree	no
372	19	female	disagree	neutral	neutral	strongly disagree	disagree	neutral		neutal	disagree	no change	disagree	no
373	21	female	agree	disagree	disagree	agree	disagree	neutral		disagree	neutral	no change	disagree	no
374	25	male	agree	agree	strongly agree	agree	neutral	neutral		strongly agree	disagree	no change	strongly agree	no
375	23	female	strongly agree	agree	agree	strongly agree	strongly disagree	agree	since 1 month	neutal	strongly disagree	no change	strongly disagree	no
376	25	male	strongly agree	strongly disagree	strongly agree	agree	neutral	strongly disagree		neutal	strongly agree	depressed	agree	no
377	23	female	strongly agree	neutral	strongly agree	agree	agree	disagree		strongly agree	agree	increased	strongly agree	no
378	24	male	strongly agree	strongly agree	agree	strongly agree	disagree	neutral		neutal	strongly agree	increased	agree	no
379	21	female	strongly agree	agree	strongly agree	strongly agree	agree	agree	since 6 months	agree	disagree	no change	strongly agree	no
380	22	female	strongly agree	agree	disagree	neutral	strongly agree	strongly agree	since 4 years	agree	agree	depressed	agree	no
381	22	female	strongly agree	agree	agree	strongly agree	agree	strongly agree	since 4 months	disagree	disagree	no change	agree	no
382	27	male	strongly agree	agree	agree	disagree	strongly agree	neutral		neutal	disagree	no change	strongly agree	no
383	22	male	disagree	neutral	agree	agree	strongly agree	disagree		agree	disagree	no change	agree	no
384	21	male	strongly agree	strongly agree	agree	neutral	disagree	neutral		neutal	agree	depressed	agree	no
385	22	male	agree	agree	agree	strongly disagree	strongly agree	agree	since 2 months	agree	agree	depressed	strongly agree	no
386	20	male	strongly disagree	strongly disagree	disagree	strongly agree	strongly agree	strongly disagree		strongly agree	strongly agree	increased	strongly disagree	no
387	21	male	strongly disagree	strongly disagree	disagree	strongly agree	disagree	strongly disagree		strongly agree	strongly agree	depressed	strongly disagree	no
388	23	male	strongly disagree	strongly disagree	disagree	strongly agree	strongly disagree	agree	since 2 years	strongly disagree	strongly disagree	no change	disagree	no
389	23	male	strongly agree	strongly agree	strongly disagree	strongly agree	strongly disagree	agree	since last year	strongly disagree	strongly agree	no change	disagree	no
390	20	male	disagree	strongly disagree	strongly agree	strongly disagree	strongly agree	strongly disagree		strongly agree	strongly disagree	no change	disagree	no
391	24	male	agree	agree	neutral	agree	disagree	disagree		agree	agree	increased	strongly disagree	no
392	24	male	strongly agree	strongly disagree	strongly disagree	strongly agree	strongly agree	agree	since 2 months	neutal	disagree	no change	strongly agree	no
393	24	male	agree	agree	strongly agree	agree	strongly disagree	agree	since 1 month	disagree	disagree	no change	strongly agree	no
394	23	male	strongly disagree	strongly disagree	strongly agree	strongly agree	strongly disagree	strongly disagree		strongly agree	strongly agree	depressed	disagree	no
395	23	male	strongly disagree	disagree	neutral	strongly agree	strongly agree	strongly disagree		strongly agree	strongly disagree	no change	disagree	no
396	21	female	strongly agree	strongly agree	strongly agree	strongly disagree	disagree	strongly agree	since 4 years	strongly disagree	strongly disagree	no change	disagree	no
397	23	male	strongly disagree	disagree	strongly disagree	strongly agree	strongly agree	strongly disagree		strongly agree	agree	depressed	strongly disagree	no
398	22	male	strongly disagree	disagree	strongly agree	strongly disagree	strongly agree	strongly disagree		strongly agree	strongly disagree	no change	strongly disagree	no
399	21	male	strongly disagree	strongly agree	strongly disagree	strongly agree	disagree	strongly disagree		strongly agree	strongly agree	depressed	strongly disagree	no
400	21	male	strongly disagree	strongly disagree	disagree	strongly agree	strongly disagree	strongly agree	since 2 years	strongly disagree	agree	depressed	disagree	no
401	25	male	strongly agree	strongly agree	disagree	strongly disagree	strongly agree	strongly disagree		strongly agree	strongly disagree	no change	strongly disagree	no
402	23	male	agree	agree	neutral	neutral	disagree	disagree		agree	disagree	no change	disagree	no
403	23	male	strongly disagree	strongly disagree	strongly agree	strongly agree	disagree	disagree		strongly agree	strongly agree	increased	strongly disagree	no
404	22	male	strongly agree	strongly agree	strongly agree	disagree	disagree	strongly disagree		strongly disagree	strongly disagree	no change	neutral	no
405	19	female	strongly disagree	disagree	strongly disagree	disagree	strongly agree	strongly disagree		strongly agree	strongly disagree	no change	strongly disagree	no
406	21	male	strongly disagree	strongly disagree	strongly disagree	strongly disagree	strongly agree	strongly agree	since 3 months	strongly disagree	strongly disagree	no change	strongly disagree	no
407	23	male	strongly agree	agree	agree	neutral	strongly disagree	strongly agree	since 4 months	neutal	strongly agree	depressed	agree	no
